# Supplementary material
Source: Springer Nature journal article supplement (https://www.springermedizin.de/resource/supplementary/12958_2003_36_MOESM11_ESM.pdf/9566230)
Supplement: MOESM11 [file 9566230]

Asymmetric division (proliferation and differentiation) – stromal and ST signaling

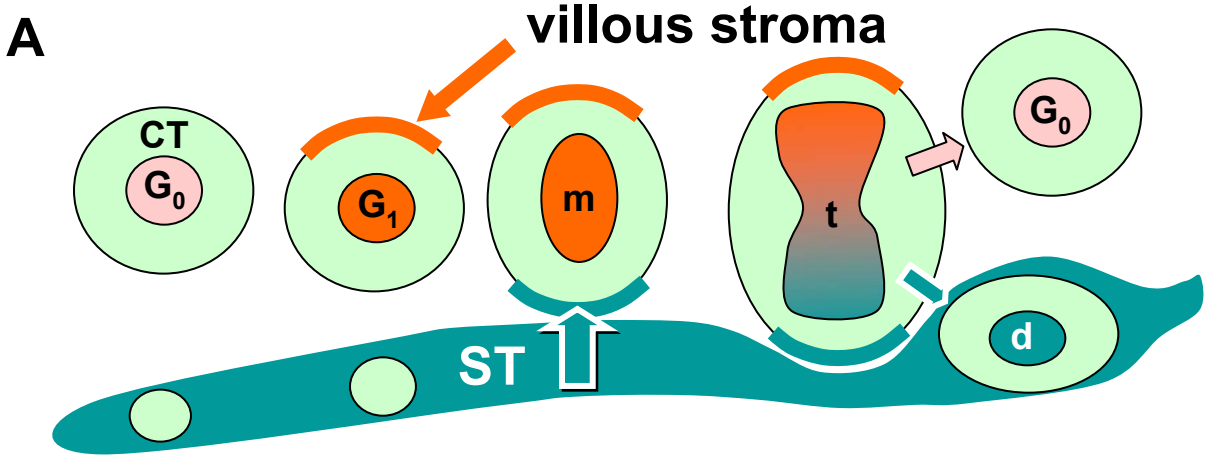

Symmetric division resulting in proliferation - stromal signaling only

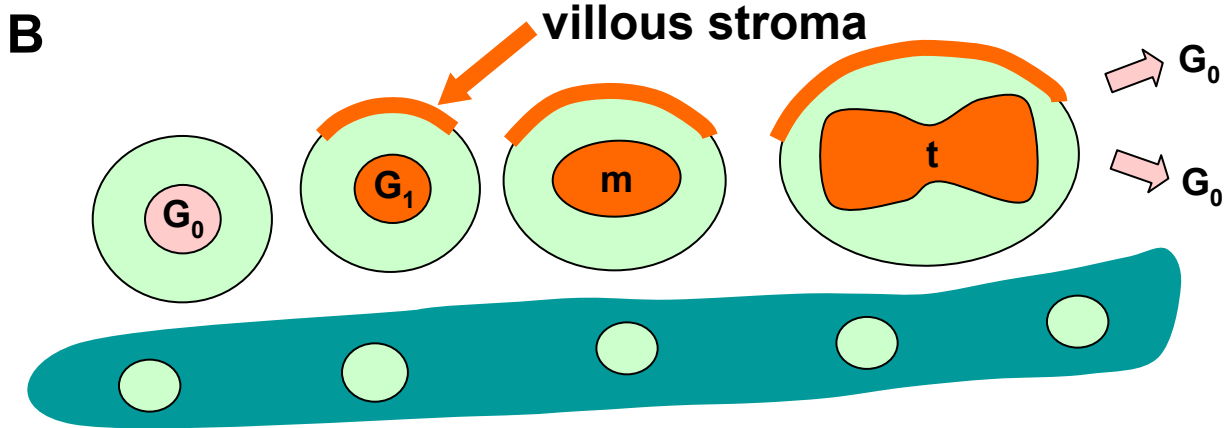

Symmetric division resulting in differentiation (cultured CT)

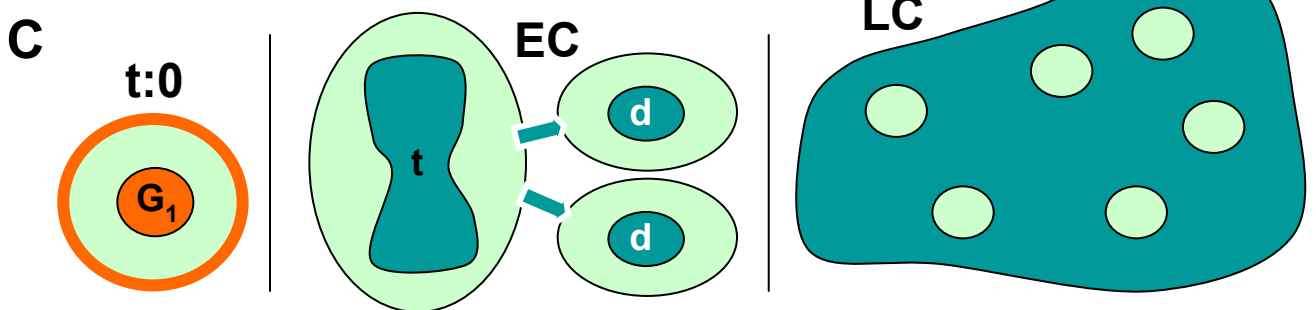

-  quiescence
-  proliferation-associated signaling and proteins (Notch; ER $\alpha$ )
-  differentiation-associated proteins (Numb; ER $\beta$ ; p27)
